# Supplementary material
Source: PubMed Central journal article supplement (PMC6484889)
Supplement: kfz038_supp.pdf [file kfz038_supp.pdf]

## Supplementary Data

### Cardiac Toxicity from Ethanol Exposure in Human Induced Pluripotent Stem Cell-Derived Cardiomyocytes

Antonio Rampoldi<sup>\*,1</sup>, Monalisa Singh<sup>\*,1</sup>, Qingling Wu<sup>\*,†,1</sup>, Meixue Duan<sup>‡</sup>, Rajneesh Jha<sup>\*</sup>, Joshua T. Maxwell<sup>\*</sup>, Joshua M. Bradner<sup>§</sup>, Xiaoyu Zhang<sup>||</sup>, Anita Saraf<sup>\*,¶</sup>, Gary W. Miller<sup>§</sup>, Greg Gibson<sup>‡</sup>, Lou Ann Brown<sup>\*</sup>, Chunhui Xu<sup>\*,†,2</sup>

<sup>\*</sup>Division of Pediatric Cardiology, Department of Pediatrics, Emory University School of Medicine and Children's Healthcare of Atlanta, Atlanta, GA 30322

<sup>†</sup>Wallace H. Coulter Department of Biomedical Engineering, Georgia Institute of Technology and Emory University, Atlanta, Georgia 30322

<sup>‡</sup>School of Biological Sciences, Georgia Institute of Technology, Atlanta, Georgia 30332

<sup>§</sup>Department of Environmental Health, Rollins School of Public Health, Emory University, Atlanta, Georgia 30322

<sup>||</sup>ACEA Biosciences, Inc., San Diego, California 92121

<sup>¶</sup>Division of Cardiology, Emory University School of Medicine, Atlanta, Georgia 30322

<sup>1</sup>These authors contributed equally to this study

<sup>2</sup>Correspondence: [chunhui.xu@emory.edu](mailto:chunhui.xu@emory.edu)

## Supplementary Methods

*The effect of ROS scavenger N-acetyl cysteine (NAC) on the ethanol-induced phenotype.* hiPSC-CMs were dissociated using 0.25% trypsin-EDTA and plated onto Matrigel-coated 96-well culture plates at a density of  $2.5 \times 10^4$  cells/well and cultured for 2 days to allow the cells to recover spontaneous beating. The cells were pre-treated with ROS scavenger NAC (Sigma) at 2 mM for 1 h and then treated with 0 or 50 mM ethanol in the presence of 2 mM NAC for 5 days. The dose of NAC was selected based on previous studies showing that 2 mM NAC was effective in reducing ROS production in cells treated with substances that stimulate oxidative stress (Yiran *et al.*, 2013; Zhen *et al.*, 2015). hiPSC-CMs treated with 0 or 50 mM ethanol without NAC were used as controls. The cells were covered with mineral oil to prevent ethanol evaporation, and medium was changed daily. The amount of ROS produced by ethanol exposure and its effects on  $\text{Ca}^{2+}$  transients were evaluated at the end of the treatment.

The generation of intracellular and mitochondrial ROS was assessed using carboxy-H2DCFDA (Thermo Fisher Scientific) and MitoSOX Red (Thermo Fisher Scientific), respectively. The ethanol-containing medium and mineral oil were aspirated and cells were washed twice with warm D-PBS and incubated with both 25  $\mu\text{M}$  carboxy-H2DCFDA and 5  $\mu\text{M}$  MitoSOX Red working solution in warm D-PBS for 15 min at 37°C, protected from light. Cells were washed twice with warm D-PBS and counter-stained with Hoechst (Thermo Fisher Scientific) in warm buffer and imaged immediately using an ArrayScan™ XTI Live High Content Platform (Life Technologies). Images of carboxy-H2DCFDA, MitoSOX Red and Hoechst were acquired and quantitatively analyzed using ArrayScan™ XTI Live High Content Platform. Twenty fields/well were selected and 4 replicate wells per condition were imaged using a 10x objective. Acquisition software Cellomics Scan (Thermo Fisher Scientific) was used to capture images, and data analysis were performed using Cellomics View Software (Thermo Fisher Scientific). Images were analyzed with mask modifier for Hoechst restricted to the nucleus. Carboxy-H2DCFDA and MitoSOX Red were each quantified with a spot mask that extended 7 units from the nucleus. Spot threshold was set to 10 units and detection limit was set at 25 units. Mean carboxy-H2DCFDA and MitoSOX Red average fluorescence intensity of cells per well in each treatment group was used as readout.

Live cell imaging of intracellular  $\text{Ca}^{2+}$  transient was performed using Fluo-4, AM, a cell permeant-fluorescent  $\text{Ca}^{2+}$  dye (Thermo Fisher Scientific). Cells were incubated with the 10  $\mu\text{M}$  Fluo-4, AM for 20 min at 37°C followed by a 20 min wash at room temperature in Tyrode's solution (148 mM NaCl, 4 mM KCl, 0.5 mM  $\text{MgCl}_2 \cdot 6\text{H}_2\text{O}$ , 0.3 mM  $\text{NaPH}_2\text{O}_4 \cdot \text{H}_2\text{O}$ , 5 mM HEPES, 10 mM D-Glucose, 1.8 mM  $\text{CaCl}_2 \cdot \text{H}_2\text{O}$ , pH adjusted to 7.4 with NaOH). Fluorescence was imaged over time using an ImageXpress Micro XLS System (Molecular Devices) at 20x objective and 30 frame per second. Fluorescence was measured from the entire cell region and dye excitation at 488 nm and emission at >500 nm.

## References

- Jha, R., Wu, Q., Singh, M., Preininger, M. K., Han, P., Ding, G., Cho, H. C., Jo, H., Maher, K. O., Wagner, M. B., *et al.* (2016). Simulated microgravity and 3D culture enhance induction, viability, proliferation and differentiation of cardiac progenitors from human pluripotent stem cells. *Sci Rep* **6**, 30956.
- Yiran, Z., Chenyang, J., Jiajing, W., Yan, Y., Jianhong, G., Jianchun, B., Xuezhong, L., and Zongping, L. (2013). Oxidative stress and mitogen-activated protein kinase pathways involved in cadmium-induced BRL 3A cell apoptosis. *Oxid Med Cell Longev* **2013**, 516051.
- Zhen, Y. Z., Lin, Y. J., Li, K. J., Yang, X. S., Zhao, Y. F., Wei, J., Wei, J. B., and Hu, G. (2015). Gambogic acid lysinate induces apoptosis in breast cancer mcf-7 cells by increasing reactive oxygen species. *Evid Based Complement Alternat Med* **2015**, 842091.

**Supplementary Table 1.** Stages of alcohol intoxication

| <b>Blood alcohol concentration (BAC) in g/100 ml of blood</b> | <b>Corresponding concentration in mM</b> | <b>Stage</b> |
|---------------------------------------------------------------|------------------------------------------|--------------|
| 0.03 - 0.12%<br><u>0.08%: Legally permissible limit</u>       | 17 mM                                    | euphoria     |
| 0.09 - 0.25%                                                  | 50 mM                                    | excitement   |
| 0.18 - 0.30%                                                  | 100 mM                                   | confusion    |
| > 0.45%                                                       | 200 mM                                   | death        |

Adapted from <http://www.intox.com/t-physiology.aspx>

**Supplementary Table 2.** Primary antibodies for immunocytochemistry

| <b>Target</b>      | <b>Isotype</b>          | <b>Supplier</b>    | <b>Catalog #</b> | <b>Dilution</b> |
|--------------------|-------------------------|--------------------|------------------|-----------------|
| $\alpha$ -actinin  | mouse IgG <sub>1</sub>  | Sigma              | A7811            | 1:800           |
| NKX2-5             | rabbit IgG              | Santa Cruz Biotech | SC14033          | 1:200           |
| cardiac troponin T | mouse IgG <sub>1</sub>  | Fisher Scientific  | MS295P1          | 1:400           |
| cardiac troponin I | mouse IgG <sub>2b</sub> | Millipore          | MAB1691          | 1:200           |
| pan cadherin       | mouse IgG <sub>1</sub>  | Sigma              | C1821            | 1:200           |

**Supplementary Table 3.** SyBr green primers for qRT-PCR

| <b>Gene</b>  | <b>Full name (other name)</b>                        | <b>Accession code</b> | <b>Primer</b>                                                          |
|--------------|------------------------------------------------------|-----------------------|------------------------------------------------------------------------|
| <i>ACTN1</i> | Actinin, alpha 1 (ACTN1), transcript variant 3, mRNA | NM_001102             | Forward:<br>AGGTGGGAGTTACACCATGC<br>Reverse:<br>ACATGCAGCCAGAAGAGGAC   |
| <i>cTnl</i>  | Troponin I type 3                                    | NM_000363             | Forward:<br>CTCAAACCTTTTTCTTGCGGC,<br>Reverse:<br>GTGAAGAAGGAGGACACCGA |
| <i>TNNT2</i> | Troponin T type 2                                    | NM_001001431          | Forward:<br>GCGGGTCTTGGAGACTTTCT<br>Reverse:<br>TTCGACCTGCAGGAGAAGTT   |
| <i>GAPDH</i> | Glyceraldehyde-3-phosphate dehydrogenase             | NM_001256799          | Forward:<br>CTGGGCTACACTGAGCACC<br>Reverse:<br>AAGTGGTCGTTGAGGGCAATG   |

Note: Primers were retrieved from Jha *et al.*, 2016 and <http://pga.mgh.harvard.edu/primerbank/>

**Supplementary Table 4.** List of top 60 genes significantly altered in hiPSC-CMs treated with 50mM ethanol compared with untreated cells

| Symbol                     | RefseqID       | Gene name                                                              | Fold change | Adjusted P-value |
|----------------------------|----------------|------------------------------------------------------------------------|-------------|------------------|
| <b><i>Up-regulated</i></b> |                |                                                                        |             |                  |
| RN7SL1                     | NR_002715.1    | RNA, 7SL, cytoplasmic 1                                                | 2.29        | 1.19E-02         |
| MMP9                       | NM_004994.2    | matrix metalloproteinase 9                                             | 2.17        | 4.58E-07         |
| FAM19A4                    | NM_182522.4    | family with sequence similarity 19 member A4, C-C motif chemokine like | 1.56        | 5.21E-03         |
| EMID1                      | NM_133455.3    | EMI domain containing 1                                                | 1.53        | 5.58E-03         |
| COL14A1                    | NM_021110.3    | collagen type XIV alpha 1 chain                                        | 1.51        | 2.15E-12         |
| LOC100049716               | NR_122124.1    | uncharacterized LOC100049716                                           | 1.50        | 3.64E-02         |
| SYT10                      | NM_198992.3    | synaptotagmin 10                                                       | 1.49        | 1.60E-03         |
| HMCN1                      | NM_031935.2    | hemicentin 1                                                           | 1.49        | 2.55E-02         |
| SCIN                       | NM_001112706.2 | scinderin                                                              | 1.49        | 4.75E-03         |
| EDNRB                      | NM_000115.4    | endothelin receptor type B                                             | 1.48        | 4.26E-02         |
| FREM2                      | NM_207361.5    | FRAS1 related extracellular matrix protein 2                           | 1.48        | 1.67E-02         |
| KCNIP2                     | NM_014591.4    | potassium voltage-gated channel interacting protein 2                  | 1.47        | 2.06E-07         |
| TRH                        | NM_007117.4    | thyrotropin releasing hormone                                          | 1.44        | 5.43E-05         |
| TF                         | NM_001063.3    | transferrin                                                            | 1.43        | 9.90E-05         |
| SLC16A14                   | NM_152527.4    | solute carrier family 16 member 14                                     | 1.42        | 6.80E-03         |

|                              |                |                                                               |      |          |
|------------------------------|----------------|---------------------------------------------------------------|------|----------|
| KIT                          | NM_000222.2    | KIT proto-oncogene receptor tyrosine kinase                   | 1.41 | 3.72E-03 |
| PEG10                        | NM_001184962.1 | paternally expressed 10                                       | 1.41 | 4.56E-07 |
| ARRDC4                       | NM_183376.2    | arrestin domain containing 4                                  | 1.38 | 9.90E-04 |
| RASL12                       | NM_016563.3    | RAS like family 12                                            | 1.38 | 3.30E-02 |
| DIRAS3                       | NM_004675.3    | DIRAS family GTPase 3                                         | 1.37 | 1.78E-03 |
| SLC5A3                       | NM_006933.6    | solute carrier family 5 member 3                              | 1.36 | 1.63E-03 |
| KCNG1                        | NM_002237.3    | potassium voltage-gated channel modifier subfamily G member 1 | 1.36 | 3.89E-03 |
| RPLP2                        | NM_001004.3    | ribosomal protein lateral stalk subunit P2                    | 1.34 | 3.28E-04 |
| KCTD12                       | NM_138444.3    | potassium channel tetramerization domain containing 12        | 1.34 | 4.37E-03 |
| B4GAT1                       | NM_006876.2    | beta-1,4-glucuronyltransferase 1                              | 1.34 | 1.78E-03 |
| RXRG                         | NM_006917.4    | retinoid X receptor gamma                                     | 1.33 | 2.24E-02 |
| SMOC1                        | NM_001034852.2 | SPARC related modular calcium binding 1                       | 1.33 | 1.51E-03 |
| HSPE1                        | NM_002157.2    | heat shock protein family E (Hsp10) member 1                  | 1.33 | 4.63E-03 |
| WNT2                         | NM_003391.2    | Wnt family member 2                                           | 1.33 | 3.63E-02 |
| ASTN1                        | NM_004319.2    | astrotactin 1                                                 | 1.32 | 1.81E-05 |
| <b><i>Down-regulated</i></b> |                |                                                               |      |          |
| ANKRD1                       | NM_014391.2    | ankyrin repeat domain 1                                       | 0.23 | 1.03E-05 |
| ATF3                         | NM_001674.3    | activating transcription factor 3                             | 0.34 | 2.26E-05 |

|              |                |                                                |      |          |
|--------------|----------------|------------------------------------------------|------|----------|
| CYR61        | NM_001554.4    | cysteine rich angiogenic inducer 61            | 0.35 | 5.91E-51 |
| CTGF         | NM_001901.2    | connective tissue growth factor                | 0.37 | 3.82E-33 |
| FCRLA        | NM_001184866.1 | Fc receptor like A                             | 0.45 | 7.98E-04 |
| GC           | NM_000583.3    | vitamin D binding protein                      | 0.47 | 4.56E-08 |
| NPPB         | NM_002521.2    | natriuretic peptide B                          | 0.47 | 5.48E-07 |
| GADD45G      | NM_006705.3    | growth arrest and DNA damage inducible gamma   | 0.47 | 1.63E-05 |
| TMEM71       | NM_144649.2    | transmembrane protein 71                       | 0.47 | 1.53E-05 |
| LOC100506725 | NR_108082.1    | uncharacterized LOC100506725                   | 0.50 | 4.50E-04 |
| CYP2C9       | NM_000771.3    | cytochrome P450 family 2 subfamily C member 9  | 0.50 | 4.70E-04 |
| DNAAF3       | NM_001256714.1 | dynein axonemal assembly factor 3              | 0.50 | 1.21E-02 |
| SPP1         | NM_001040058.1 | secreted phosphoprotein 1                      | 0.51 | 9.03E-05 |
| SLC5A1       | NM_000343.3    | solute carrier family 5 member 1               | 0.51 | 1.74E-03 |
| LMOD2        | NM_207163.2    | leiomodoin 2                                   | 0.52 | 4.64E-07 |
| CFH          | NM_000186.3    | complement factor H                            | 0.52 | 8.05E-04 |
| SLC17A4      | NM_005495.2    | solute carrier family 17 member 4              | 0.54 | 2.41E-02 |
| MYH4         | NM_017533.2    | myosin heavy chain 4                           | 0.54 | 5.70E-04 |
| MYL2         | NM_000432.3    | myosin light chain 2                           | 0.54 | 4.87E-04 |
| UGT2A3       | NM_024743.3    | UDP glucuronosyltransferase family 2 member A3 | 0.55 | 2.28E-04 |
| TNFRSF12A    | NM_016639.2    | TNF receptor superfamily member 12A            | 0.56 | 2.26E-11 |



|            |                |                                                           |      |          |
|------------|----------------|-----------------------------------------------------------|------|----------|
| OTUD1      | NM_001145373.2 | OTU deubiquitinase 1                                      | 0.57 | 7.57E-18 |
| KCNJ16     | NM_018658.2    | potassium voltage-gated channel subfamily J member 16     | 0.57 | 2.87E-02 |
| UBD        | NM_006398.3    | ubiquitin D                                               | 0.58 | 4.04E-06 |
| CYP3A7     | NM_000765.4    | cytochrome P450 family 3 subfamily A member 7             | 0.58 | 7.98E-04 |
| TAGLN      | NM_001001522.2 | transgelin                                                | 0.58 | 3.98E-04 |
| MIR133A1HG | NR_110369.1    | MIR133A1 host gene                                        | 0.58 | 2.02E-09 |
| HULC       | NR_004855.2    | hepatocellular carcinoma up-regulated long non-coding RNA | 0.59 | 4.67E-03 |
| F13B       | NM_001994.2    | coagulation factor XIII B chain                           | 0.59 | 2.66E-02 |
| IER3       | NM_003897.3    | immediate early response 3                                | 0.59 | 9.75E-10 |

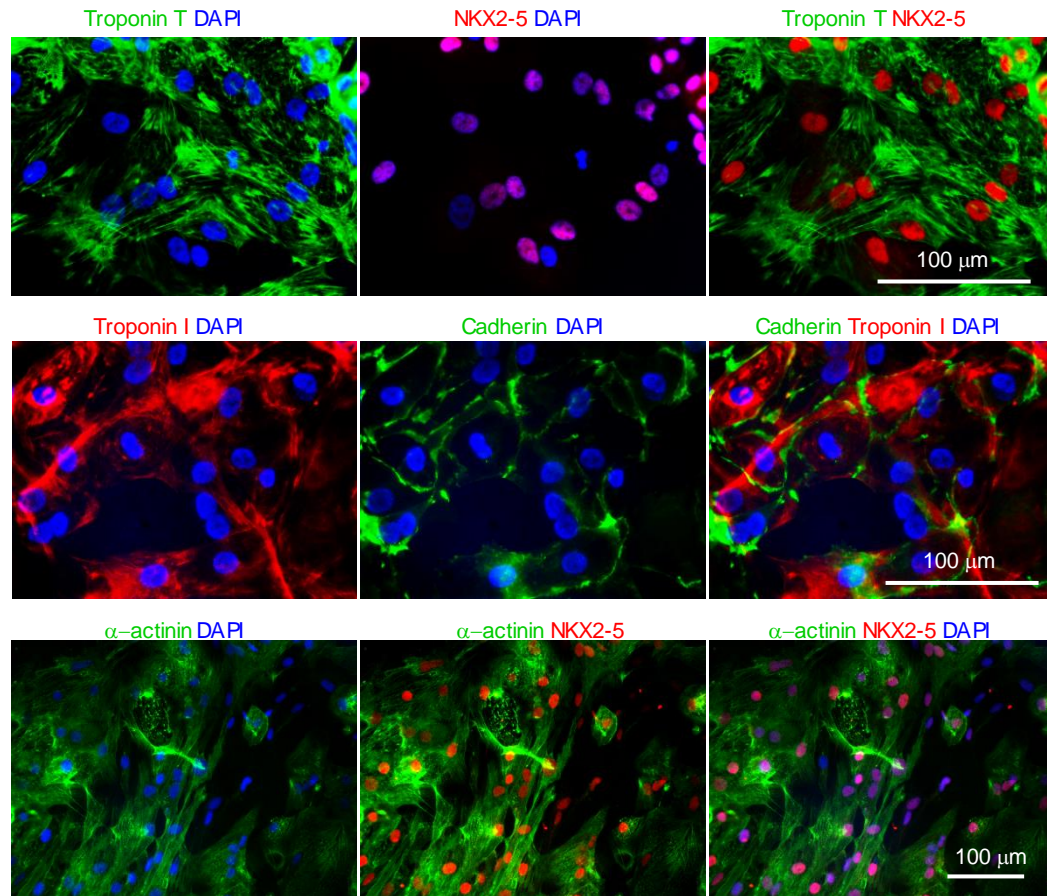

**Supplementary Figure 1.** Immunocytochemical analysis (ICC) of hiPSC-CMs revealing robust expression of CM-associated markers.

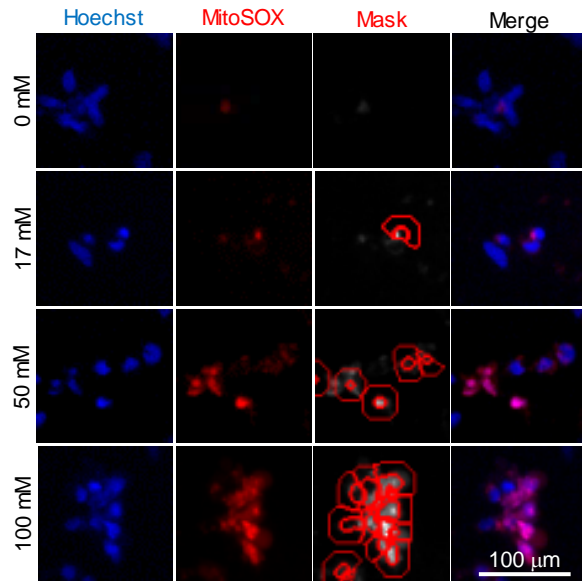

**Supplementary Figure 2.** Representative images of hiPSC-CMs for the detection of MitoSOX by ArrayScan related to Figure 3B. hiPSC-CMs were treated with ethanol for 5 days and stained with MitoSOX and Hoechst. Images were acquired and analyzed using ArrayScan. Mask, MitoSOX Red was quantified with a spot mask (ring-shape) that extended 7 units from the nucleus. Quantitative summary of average MitoSOX intensity and percentage of MitoSOX-positive cells are presented in Figure 3B.

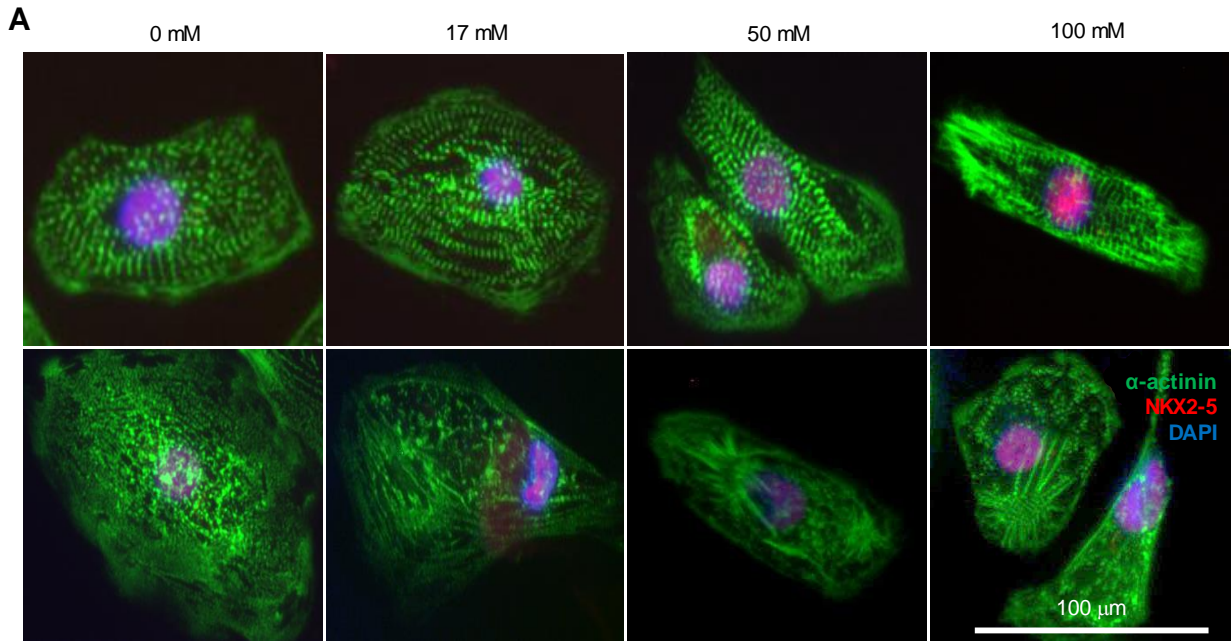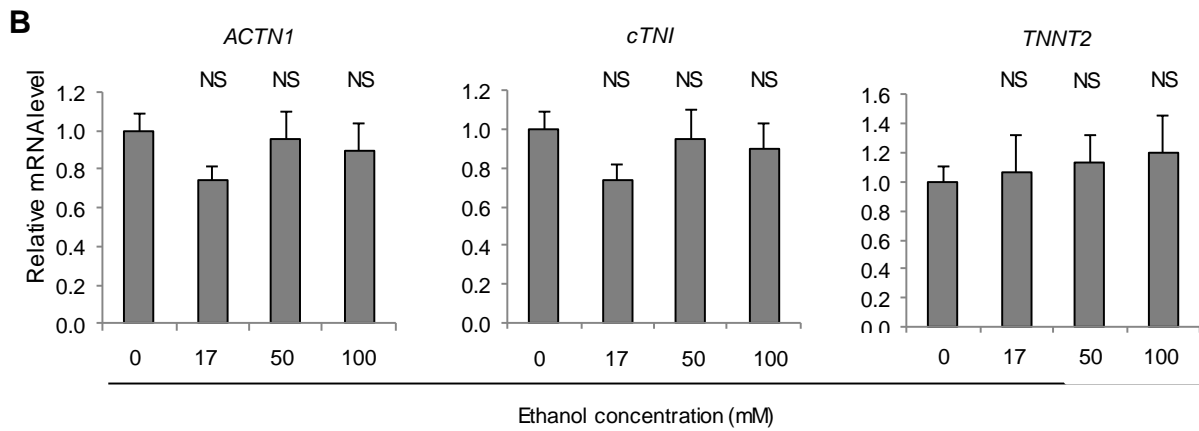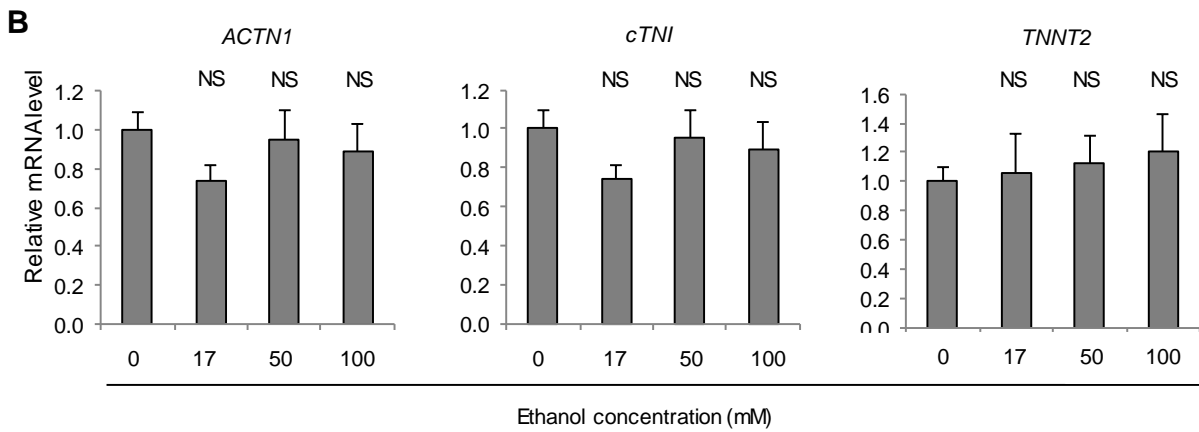

**Supplementary Figure 3.** Ethanol exposure of hiPSC-CMs has no effect on the expression of cardiac markers. (A) Immunocytochemical analysis showing the expression of cardiac transcription factor NKX2-5 and myocyte structural protein  $\alpha$ -actinin. (B) qRT-PCR panel showing relative mRNA expression levels of cardiac markers including  $\alpha$ -actinin, troponin I and troponin T. Data expressed as mean  $\pm$  SD (n = 3).

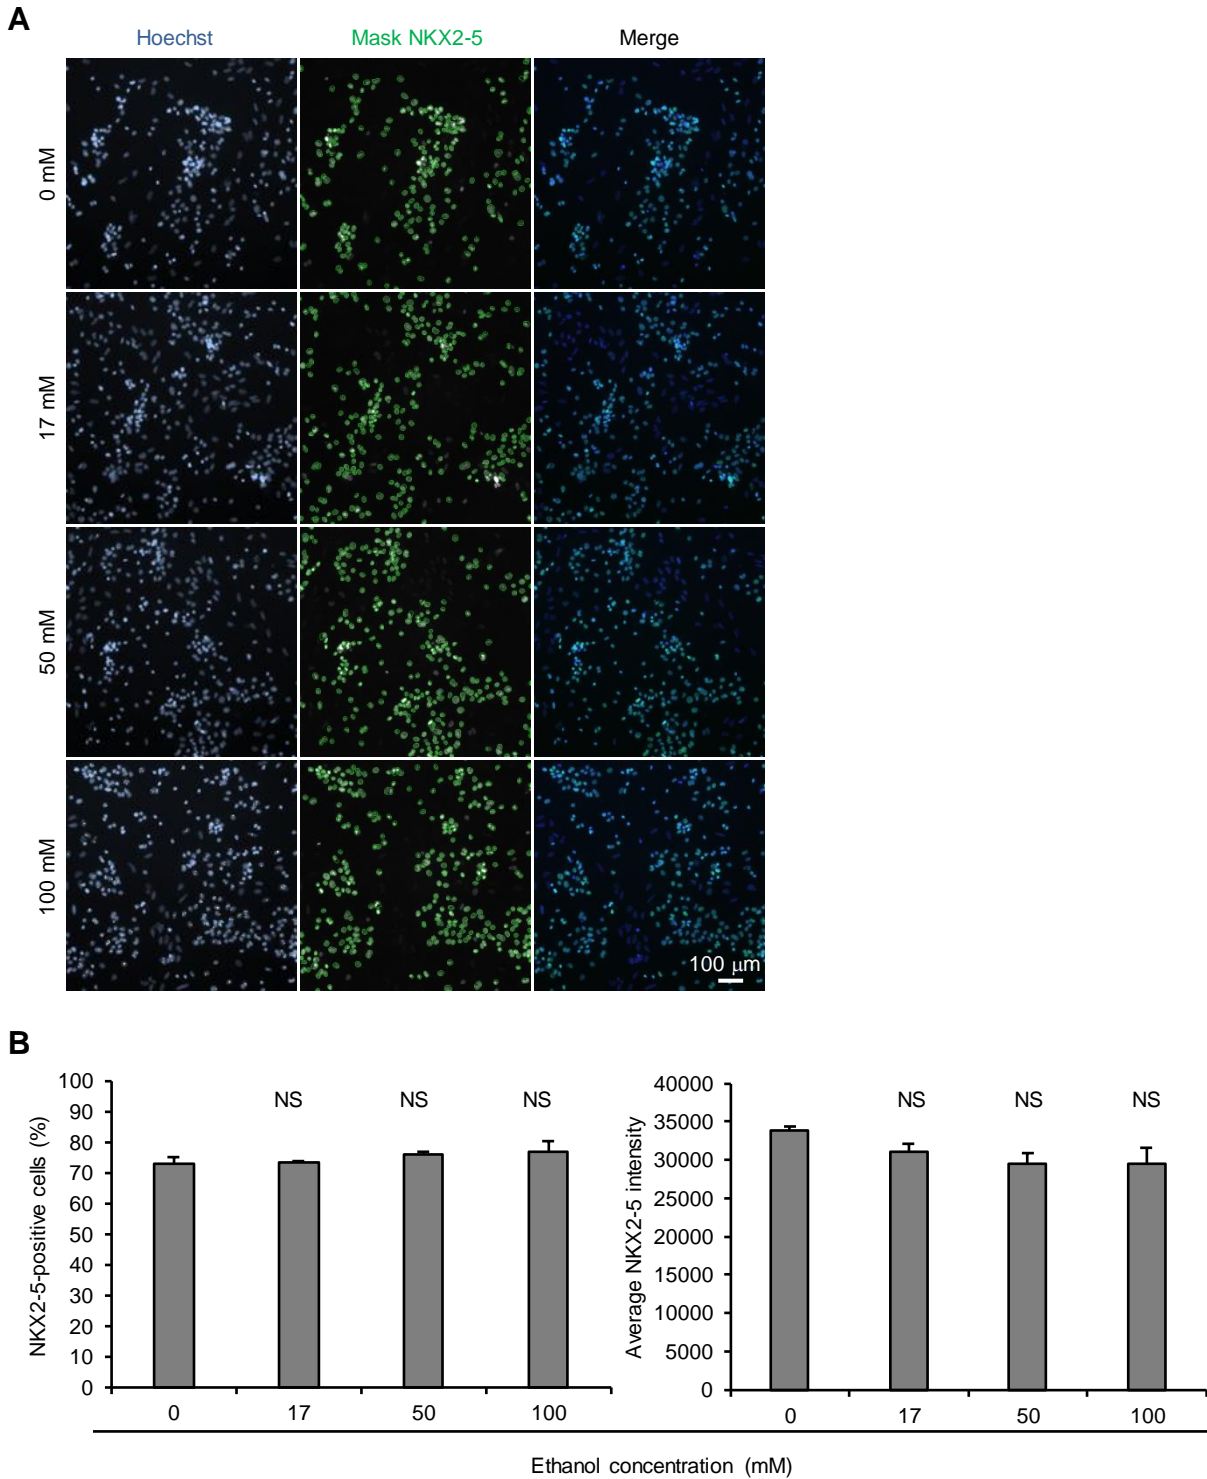

**Supplementary Figure 4.** Immunocytochemical analysis of hiPSC-CMs for the assessment of hiPSC-CM purity by ArrayScan related to Figure 4C. hiPSC-CMs were treated with ethanol for 5 days and stained with cardiac transcription factor NKX2-5 and

Hoechst. Images were acquired and analyzed using ArrayScan. NKX2-5 was quantified with mask modifier within a circular area restricted to the nuclear region. (A) Representative images. (B) Quantitative summary of percentage of NKX2-5-positive cells and average NKX2-5 intensity. Data presented as average fluorescence intensity per well and percentage of NKX2-5 positive cells, shown as mean  $\pm$  SD (n = 5). NS = no significant difference compared with control (0 mM).

**A**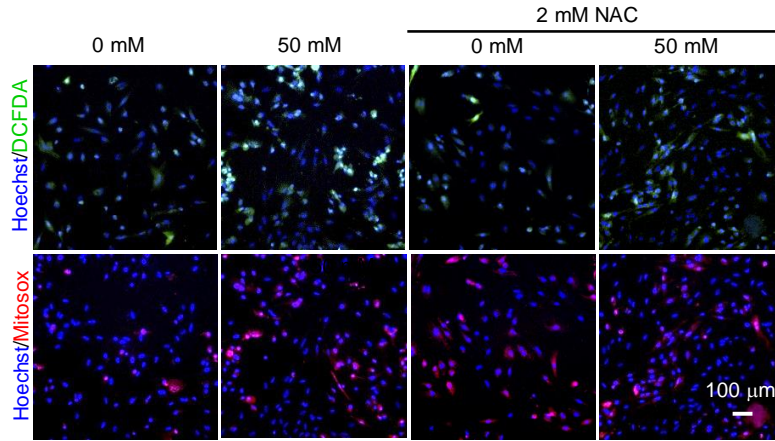**B**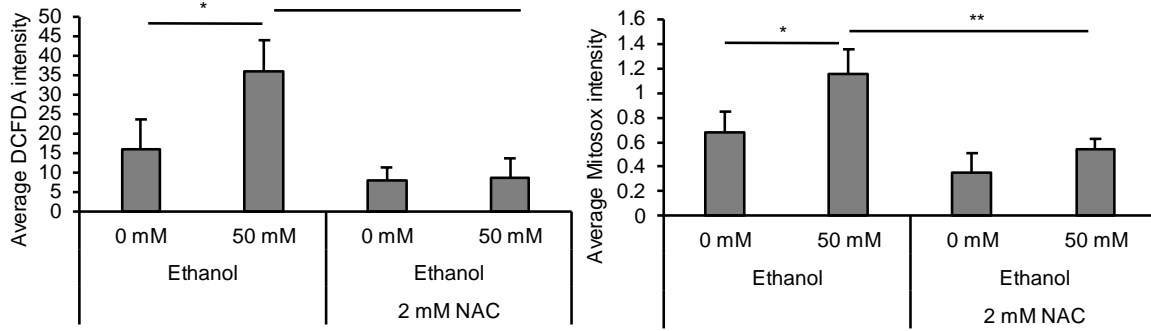**C**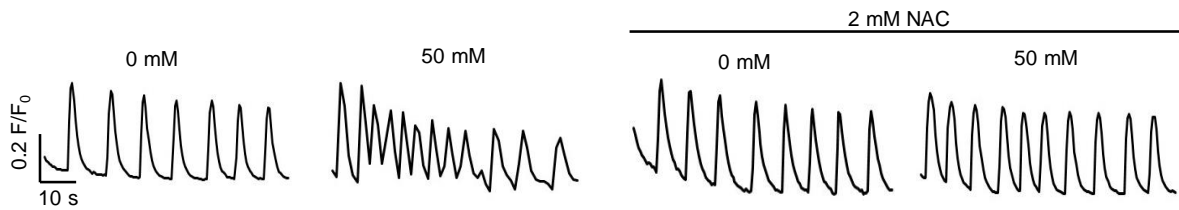**D**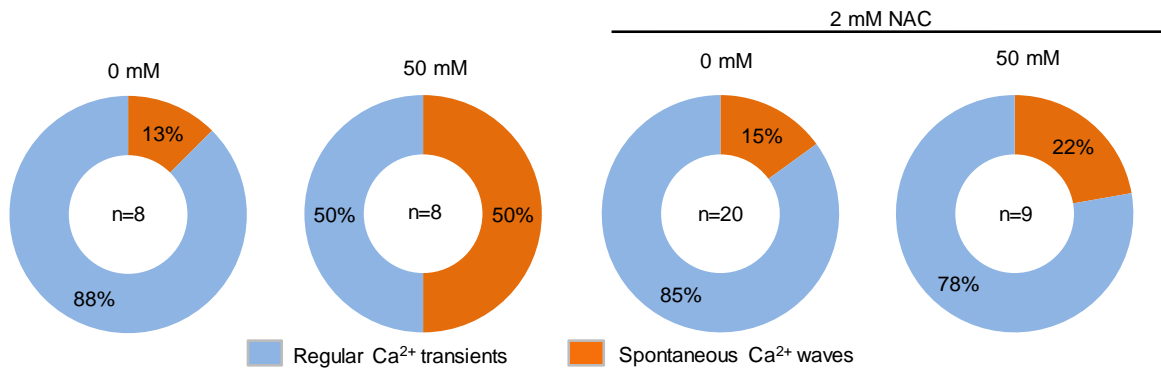



**Supplementary Figure 5.** ROS scavenger N-acetyl cysteine (NAC) reduces the ethanol-induced ROS production and abnormal  $\text{Ca}^{2+}$  transients. hiPSC-CMs were pre-treated with ROS scavenger NAC at 2 mM for 1 h followed by the treatment with 0 or 50 mM ethanol in the presence of 2 mM NAC. hiPSC-CMs treated with 0 or 50 mM ethanol without NAC were used as controls. (A) Representative images of hiPSC-CMs for the detection of ROS by ArrayScan. hiPSC-CMs were stained with DCFDA and MitoSOX Red to detect intracellular (green) and mitochondrial ROS (red), respectively. Nuclei were stained with Hoechst (blue). (B) Analysis of ROS production through ArrayScan. Data presented as average fluorescence intensity per well for both DCFDA and MitoSOX Red, shown as mean  $\pm$  SD (n = 4). \*, p-value<0.05; \*\*, p-value<0.01. (C) Representative fluorescent traces showing intercellular  $\text{Ca}^{2+}$  transients in cells. (D) Pie chart showing the percentage of cells exhibiting regular  $\text{Ca}^{2+}$  transients (blue) or  $\text{Ca}^{2+}$  transients with spontaneous  $\text{Ca}^{2+}$  waves (SCWs; orange). Sample sizes (n) are denoted in the center of the graphs for each groups.

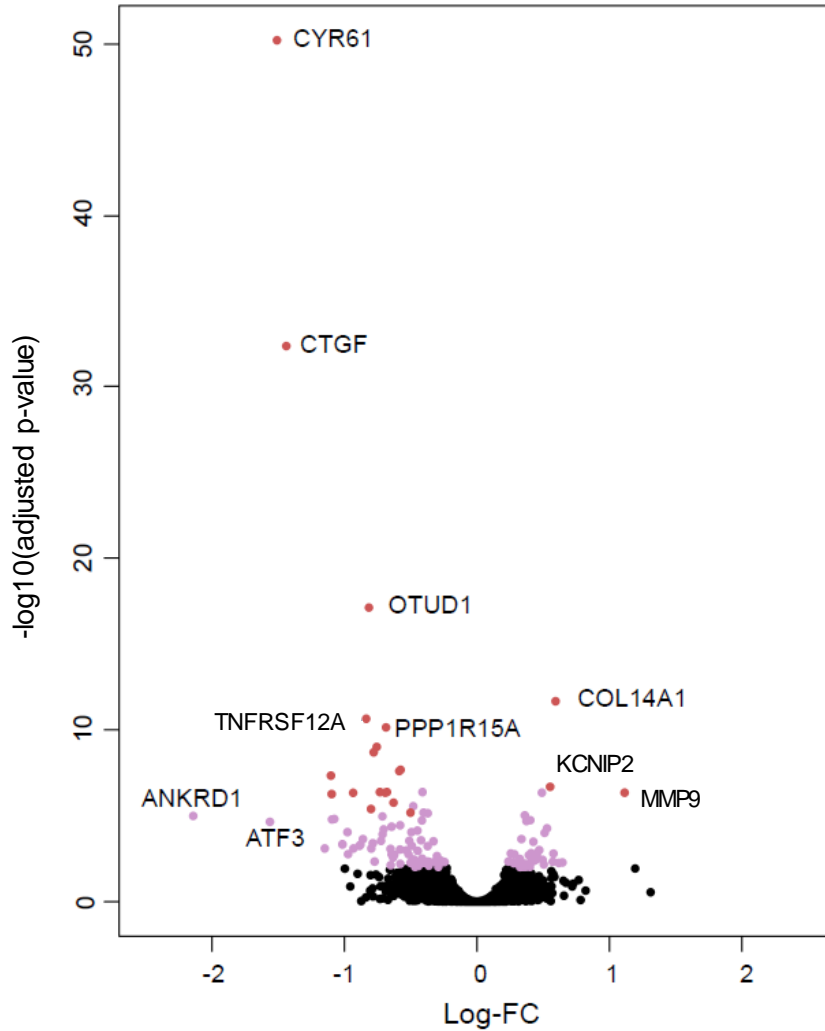

**Supplementary Figure 6.** Volcano plot of hiPSC-CM transcriptome profiles. The transcriptome of ethanol-treated cells was compared with untreated cells. The x-axis specifies log<sub>2</sub> transformed fold-changes (Log-FC) and the y-axis specifies  $-\log_{10}$  transformed p-values (NLP) from DESeq2. Each spot represents a gene detected using RNA-seq. Black colored dots are genes below statistical significance threshold (p-value  $\leq 0.05$  after adjustment with Benjamini-Hochberg correction). Plum colored dots are genes with  $-\log_{10}(\text{adjusted p-value}) \geq 2$ , and red colored dots are genes with  $-\log_{10}(\text{adjusted p-value}) \geq 5$ . Text labeled genes are those with  $-\log_{10}(\text{adjusted p-value}) > 10$  or  $\text{Log-FC} > 1.5$  or  $< -1.5$ .
